# Supplementary material for: New insights into active tectonics and seismogenic potential of the Italian Southern Alps from vertical geodetic velocities
Source: Copernicus journal article supplement (doi:10.5194/se-2020-10), 2020-03-04
Supplement: Supplementary file 1 [file se-2020-10-supplement.pdf]

1 **Supplementary material of**  
2 **New insights into active tectonics and seismogenic potential of the Italian Southern Alps from**  
3 **vertical geodetic velocities**

4

5

6 Letizia Anderlini<sup>1\*</sup>, Enrico Serpelloni<sup>2</sup>, Cristiano Tolomei<sup>2</sup>, Paolo Marco De Martini<sup>2</sup>, Giuseppe  
7 Pezzo<sup>2</sup>, Adriano Gualandi<sup>3</sup>, Giorgio Spada<sup>4</sup>

8

9 <sup>1)</sup> Istituto Nazionale di Geofisica e Vulcanologia, Bologna (Italy)

10 <sup>2)</sup> Istituto Nazionale di Geofisica e Vulcanologia, Rome (Italy)

11 <sup>3)</sup> Jet Propulsion Laboratory, California Institute of Technology (USA)

12 <sup>4)</sup> DiSPeA, Urbino University (Italy)

13

14

15

16 **Text S1 - S3**

17 **Figures S1 - S7**

18 **Tables S1 - S3**

19 **References**

20

## 21 **Text S1. GPS Data Processing**

22 The position time-series have been obtained adopting a three-step procedure approach, as in  
23 Serpelloni et al. (2006), that includes: 1) raw phase data reduction, 2) combination of loosely  
24 constrained network solutions and reference frame definition and 3) time-series analysis, including  
25 velocity estimates and spatial filtering of common mode errors.

26 The raw GPS observables have been analyzed using the 10.6 version of the GAMIT/GLOBK package  
27 (Herring et al., 2015) adopting standards defined in the framework of the IGS “Repro2 campaign”  
28 (<http://acc.igs.org/reprocess2.html>). The GAMIT software is used to estimate station positions,  
29 atmospheric delays, satellite orbits, and Earth orientation parameters from ionosphere-free linear  
30 combination GPS phase observables using double differencing techniques to eliminate phase biases  
31 caused by drifts in the satellite and receiver clock oscillators. GPS pseudo-range observables are used  
32 to constrain clock timing offsets and to improve automated editing of the phase data, assisting in the  
33 resolution of integer phase ambiguities. GPS phase data are weighted according to an elevation-angle-  
34 dependent error model (Herring et al., 2015) using an iterative analysis procedure whereby the  
35 elevation dependence is determined from the observed scatter of phase residuals.

36 In this analysis the satellites orbit parameters are fixed to the IGS final products. We use the IGS  
37 absolute antenna phase center model for both satellite and ground- based antennas, which improves  
38 the accuracy of estimates for the vertical components of site position by mitigating reference frame  
39 scale and atmospheric mapping function errors (e.g., Schmid et al., 2005, 2007). While the first-order  
40 ionospheric delay is eliminated by the ionosphere-free linear combination, the second-order  
41 ionospheric corrections are applied based on the formulation of Petrie et al. (2010), using IONEX  
42 files from the Center for Orbit Determination in Europe (CODE). The tropospheric delay is modeled  
43 as piecewise linear model and estimated using the Vienna Mapping Function 1 (VMF1; Boehm et al.,  
44 2006) with a 10° cutoff. We use the Global Pressure and Temperature 2 (GPT2; Lagler et al., 2013)  
45 model to provide a priori hydrostatic delays. The pole tide was also corrected in GAMIT by IERS  
46 standards. The Earth Orientation Parameters (EOP) are tightly constrained to priori values obtained  
47 from IERS Bulletin B. Non-tidal atmospheric loading and ocean tidal loading are corrected using  
48 MIT filtered atmospheric displacements files (available at <ftp://everest.mit.edu/pub/GRIDS>) and the  
49 FES2004 (Lyard et al., 2006) model, respectively. The International Earth Rotation Service (IERS)  
50 2003 model for diurnal and semi-diurnal solid Earth tides was set.

51 Because of the large number of stations included in our Euro-Mediterranean GPS processing (~3000),  
52 this step is performed for several sub-networks, each made by <50 stations, with each sub-network  
53 sharing a set of high-quality IGS stations, which are used as tie-stations in the combination step.

54 In the second step we use the ST\_FILTER program of the QOCA software (<http://qoca.jpl.nasa.gov>),  
55 which adopts a Kalman filter estimation algorithm (Dong et al., 1998, 2002), to combine all the daily

56 loosely constrained solutions with the global solution of the IGS network made available by MIT  
57 (<http://sopac.ucsd.edu>), and simultaneously realize a global reference frame by applying generalized  
58 constraints (Dong et al., 1998). Specifically, we define the reference frame by minimizing the  
59 velocities of the IGS core stations (<http://igs.cb.jpl.nasa.gov>), while estimating a seven- parameter  
60 transformation with respect to the GPS realization of the ITRF2008 frame (Altamimi et al., 2011),  
61 i.e., the IGB08 reference frame.

62 In the third step we analyze the position time series in order to estimate and correct offsets due to  
63 stations equipment changes, while simultaneously estimating annual and semi-annual periodic signals  
64 and a linear velocity term. In this analysis we retain only data from GPS stations with an observation  
65 period longer than 2.5 years, as shorter intervals may result in biased estimates of linear velocities  
66 (Blewitt and Lavallée, 2002). The model derived from the combination of these signals is then  
67 subtracted from the position time series in order to get the residual positions. The residual time-series  
68 are then used to estimate the Common Mode Error (CME) performing a Principal Component  
69 Analysis (PCA), as described in Dong et al. (2006). The PCA is performed at a continental-scale,  
70 over the same area used by Serpelloni et al. (2013), and the first two PCs are here considered as CME.  
71 This prevents the removal of the eventual more localized signals of geophysical interests recorded by  
72 the GPS stations in the study region, since the PCA detects the signals common to a much larger  
73 region. As a result, after removing the CME, the typical repeatability in our analysis is  $\sim 1$  mm for the  
74 horizontal components, and  $\sim 3$  mm for the vertical component, with a 30% gain in the daily  
75 repeatability and a significant improvement of the signal to noise ratio. After the spatial filtering, the  
76 estimated seasonal motions are added back to the filtered time-series, obtaining position time series  
77 with a reduced scatter around the adopted model.

78

## 79 **Text S2. Vertical Leveling Data**

80 The IGMI leveling campaigns have been performed following the International Geodetic Association  
81 standards defined in Oslo in 1948 (Vignal, 1936; 1950) that allows to have a high level accuracy of  
82 the final vertical rates. The considered leveling line is composed by almost a hundred benchmarks  
83 starting from the fixed one in Mestre (Venice) moving northward up to Fadalto valley and Val Belluna  
84 within the Venetian Eastern Southern Alps. The elevation changes measured during the campaign  
85 time interval (1952-1984) are reported in Table S2 along with the distance with respect to the  
86 reference benchmark and the position of each one in latitude and longitude. The available information  
87 on the levelling campaigns are only in terms of the final estimates of elevation values for each  
88 benchmark, without any notes about the discrepancy value obtained between forward and backward  
89 levelling measurements line, about the presence of any systematic errors and if any adjustment or  
90 correction has been applied during measurements procedures. In order to evaluate a reliable error

91 associated with the elevation change estimate, we use the formula proposed by D’Anastasio et al.  
92 (2006):

$$93 \quad e_i = \pm \sqrt{2 \sum_{j=1}^i (\sigma \sqrt{l_j})^2}$$

94 where  $l_i$  is the distance (in km) between consecutive benchmarks (thus  $\sum_{j=1}^i l_j = L_i$  indicates the  
95 distance of each benchmark from the reference one) and  $\sigma$  is the maximum allowed discrepancy  
96 between forward and backward levelling line standard error of a 1 km long levelled segment, for  
97 which we use the value of  $2.5 \text{ mm}/\sqrt{\text{km}}$  (D’Anastasio et al., 2006). The propagated error  $e_i$  indicates  
98 the error between the fixed benchmark and the  $i$ -th benchmark, representing the maximum allowable  
99 random error propagation (D’Anastasio et al., 2006). The propagated error is graphically depicted in  
100 Fig. S3A with the two continuous curves that allow to evaluate which elevation changes can be  
101 considered significant with respect to this maximum allowable random error. The error of the  
102 elevation change rate has been calculated considering the time interval of measurements ( $\Delta t = 32$   
103 years) as follows:  $e_{ECi} = e_i/\Delta t$  (see Table S2 and Figure S3B).

104

105

### 106 **Text S3. Subsampling InSAR data method**

107 The method used to subsample InSAR datasets is based on the pixel density. The number of InSAR  
108 pixel is reduced maintaining the information of deformation provided by the original velocity field.  
109 We take into account the original area covered by the InSAR frame as the rectangle identified by the  
110 minimum and maximum values of latitude and longitude of InSAR pixels. We subdivide this  
111 rectangle into sub-portions until within each one there’s a number of pixel lower than a reference one,  
112  $n_{crit}$ . At this point each sub-portion is represented by just one pixel whose associated longitude,  
113 latitude and velocity are calculated as the median values of the enclosed pixels. The subsampling has  
114 been performed for both the ascending and descending solutions just on a portion of the InSAR  
115 dataset that is a 35 km wide stripe across the Montello and Bassano-Valdobbiadene thrusts along the  
116 NNW direction (see Figure S4). Considering two iterations of subdivisions, we define the number of  
117 divisions along longitude and latitude assuming two parameters:

- 118 1. the final number of pixel we want to obtain after the subsampling,  $Np$ ;
- 119 2. the percentage of area,  $R$ , covered by the original InSAR data with respect to the initial  
120 rectangle.

121 For the first parameter we considered the same number for both datasets in order to do not have any  
122 predominance of one to the other, and to have a final dataset of few thousands of points that do not

123 generate too much high computational costs. The second value is a more empirical estimate that could  
124 vary from 20% to 45%. The two parameters are related to each other in order to define the total  
125 number of subcells at the end of the two iterations. This means that if we want  $N_p$  final points for an  
126 initial dataset that covers the starting region of  $R$  percentage, the subdivision along longitude ( $div_{lon}$ )  
127 and along latitude ( $div_{lat}$ ) are such that the following relation is valid:

$$128 \quad \frac{N_p}{R} = (div_{lon} * div_{lat})^2$$

129 Along this rationale, we define the two parameters  $div_{lon}$  and  $div_{lat}$  by trial and error in order to get  
130 the most equal number  $N_p$  possible for the two datasets. For each settled  $div_{lon}$  and  $div_{lat}$  we define  
131 the critical number of pixel,  $n_{crit}$ , below which the cell is not further subdivided, as follows:

$$132 \quad n_{crit} = \frac{T_p}{div_{lon} * div_{lat}}$$

133 where  $T_p$  indicates the initial number of pixel of the InSAR dataset.

134 The specific parameters considered in each subsampling for both the ascending and descending  
135 datasets are reported in Table S3.

136

137

138

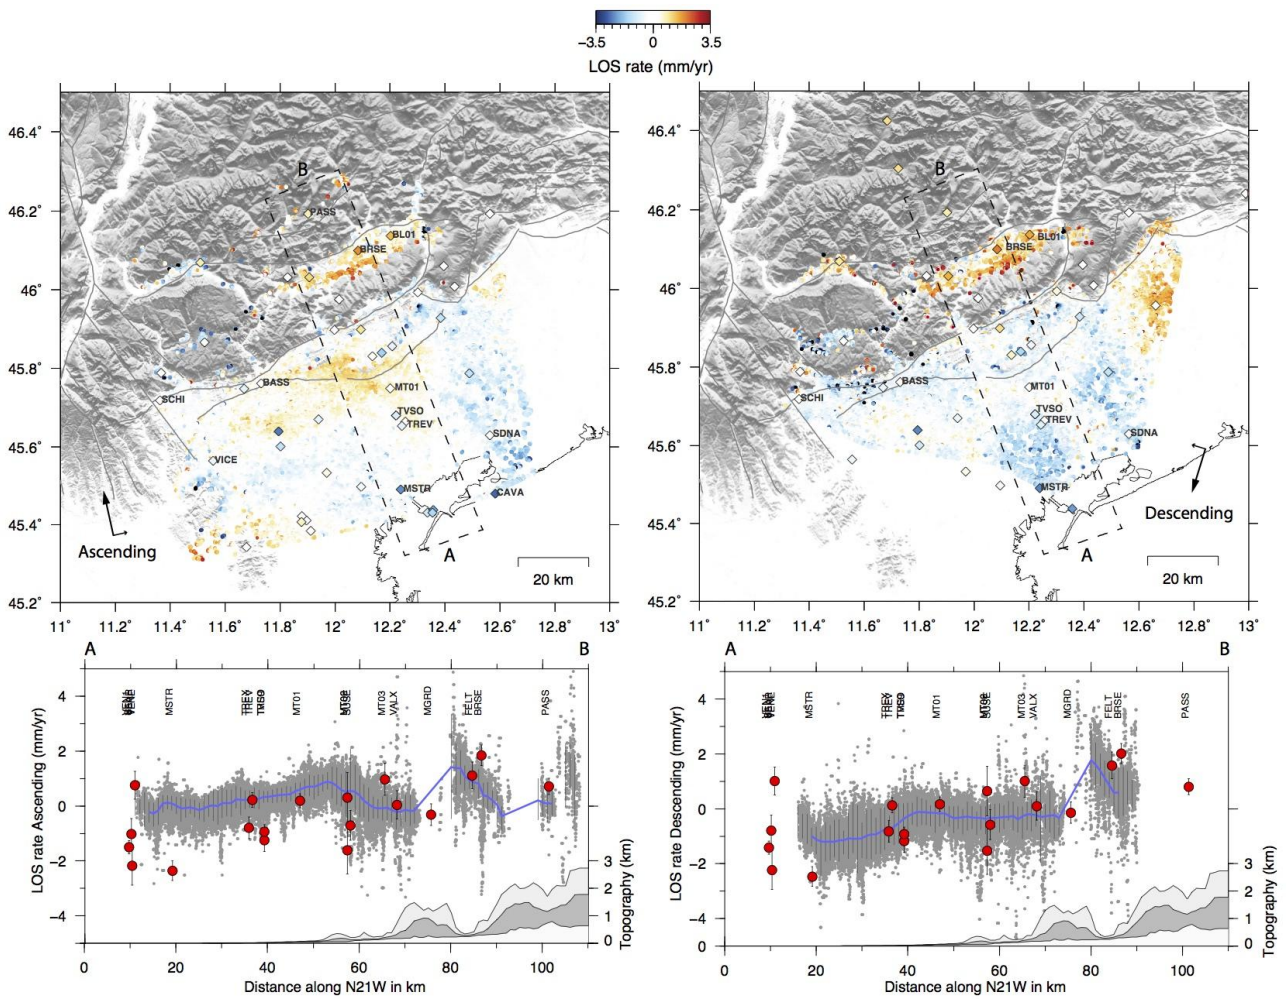

139

140

141 **Figure S1** InSAR line-of-sight (LOS) velocities for the ascending (left) and descending (right),  
 142 with negative (blue) and positive (red) values indicating increasing and decreasing distance between  
 143 the Earth surface and the satellite. Colored diamonds indicate the 3D GPS velocities projected along  
 144 the SAR LOS directions. Bottom panels show the SAR and GPS LOS velocities along the A-B cross  
 145 section (dashed box) for the ascending and descending orbits, respectively.

146

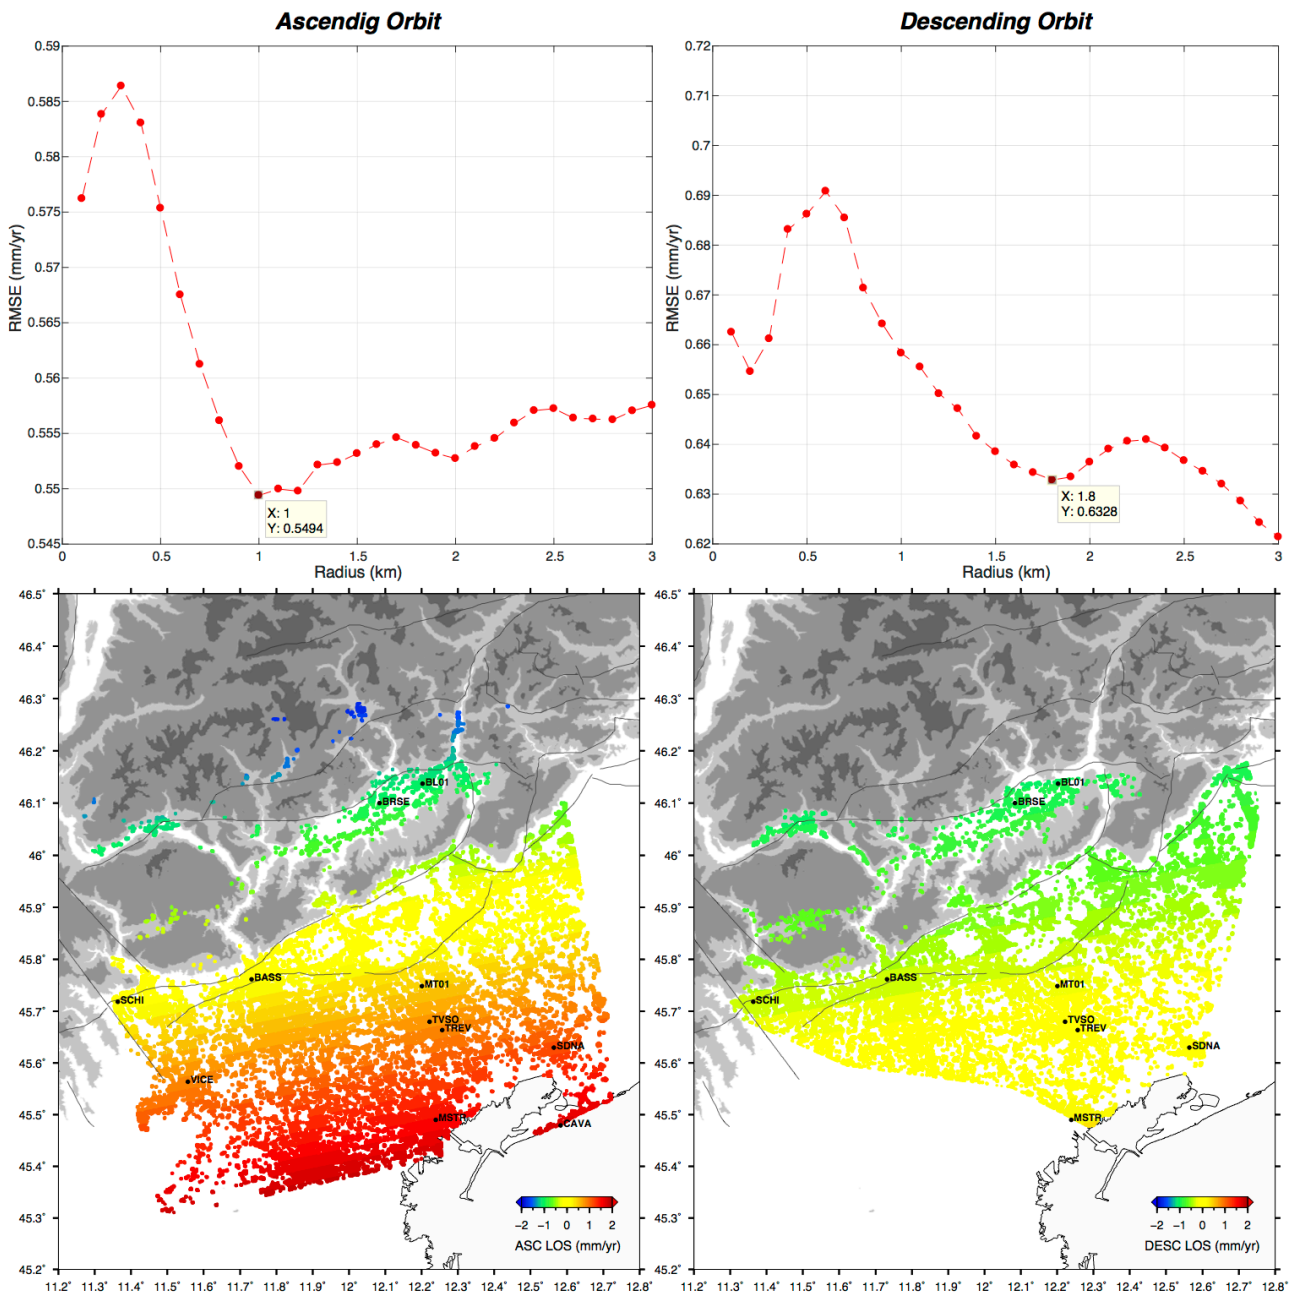

147  
 148  
 149  
 150  
 151  
 152  
 153  
 154  
 155  
 156  
 157  
 158

**Figure S2** Planar ramp correction for InSAR datasets - Top: RMSE estimate after the planar signal removal for the considered GPS stations (named sites in the bottom panels) varying the neighbouring radius and considering the mean value of InSAR velocities as representative of each point. We choose the radius for which we obtain the minimum of the RMSE, i.e. 1 km for the ascending dataset and 1.8 km for the descending one - Bottom: final planar ramp correction applied to the ascending (left) and descending (right) datasets.

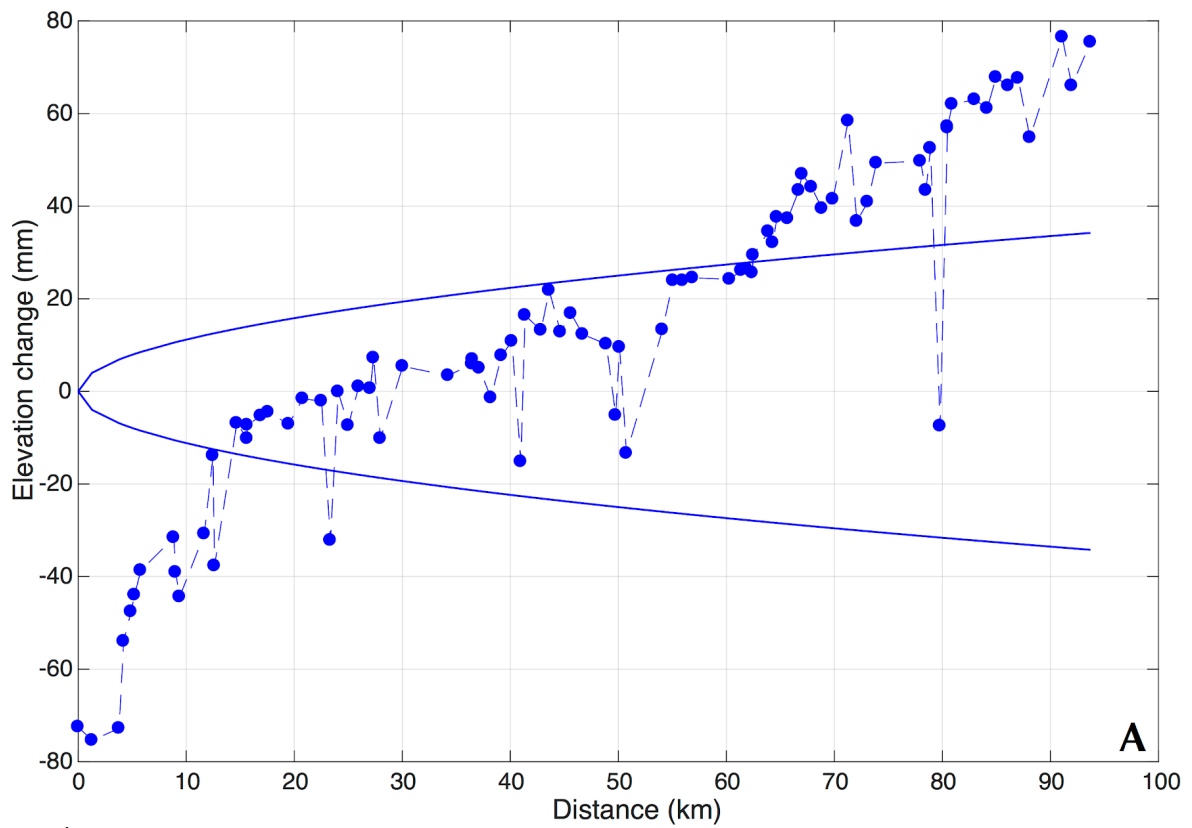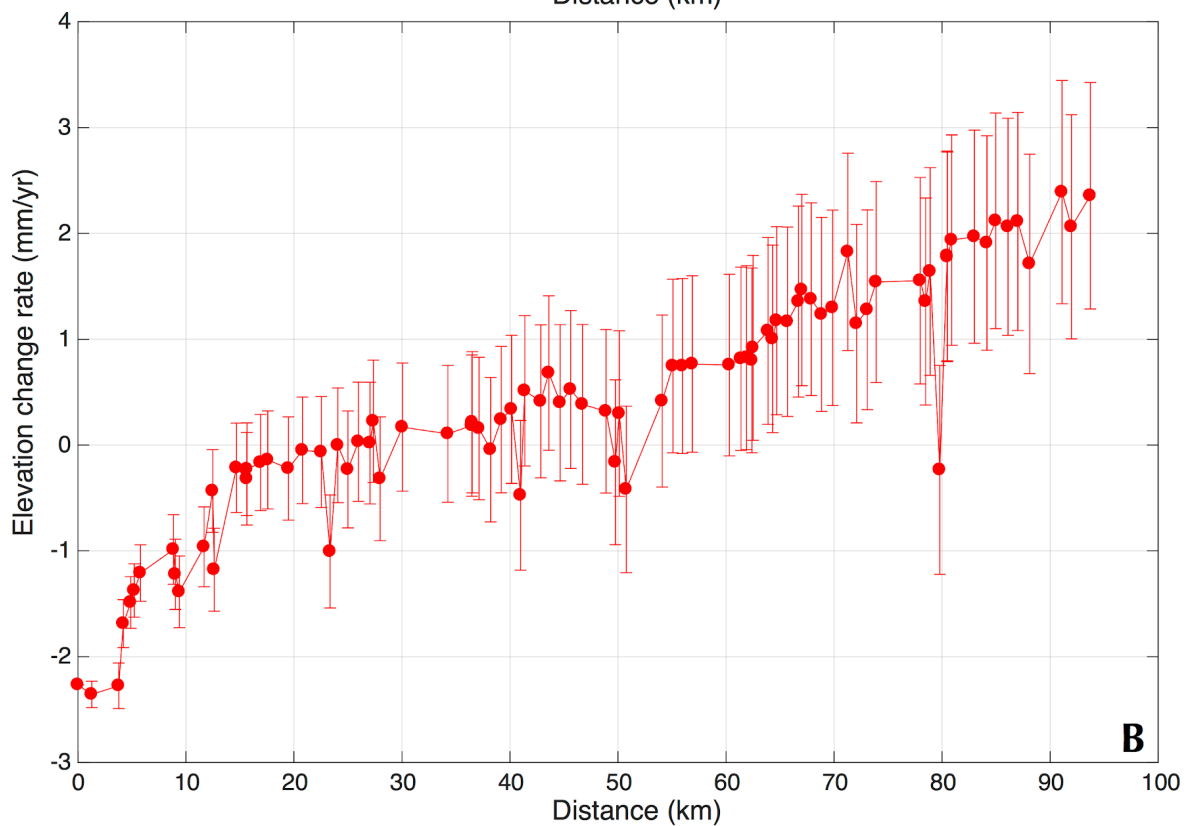

159  
 160 **Figure S3** A. Elevation change estimates along the leveling line measured in the time interval 1952-  
 161 1984 (EC values in Table S2), continuous lines indicate the maximum propagation error allowed  
 162 following the calculation indicated in Text S2 - B. Elevation change rates from leveling data with  
 163 associated errors (see Table S2).



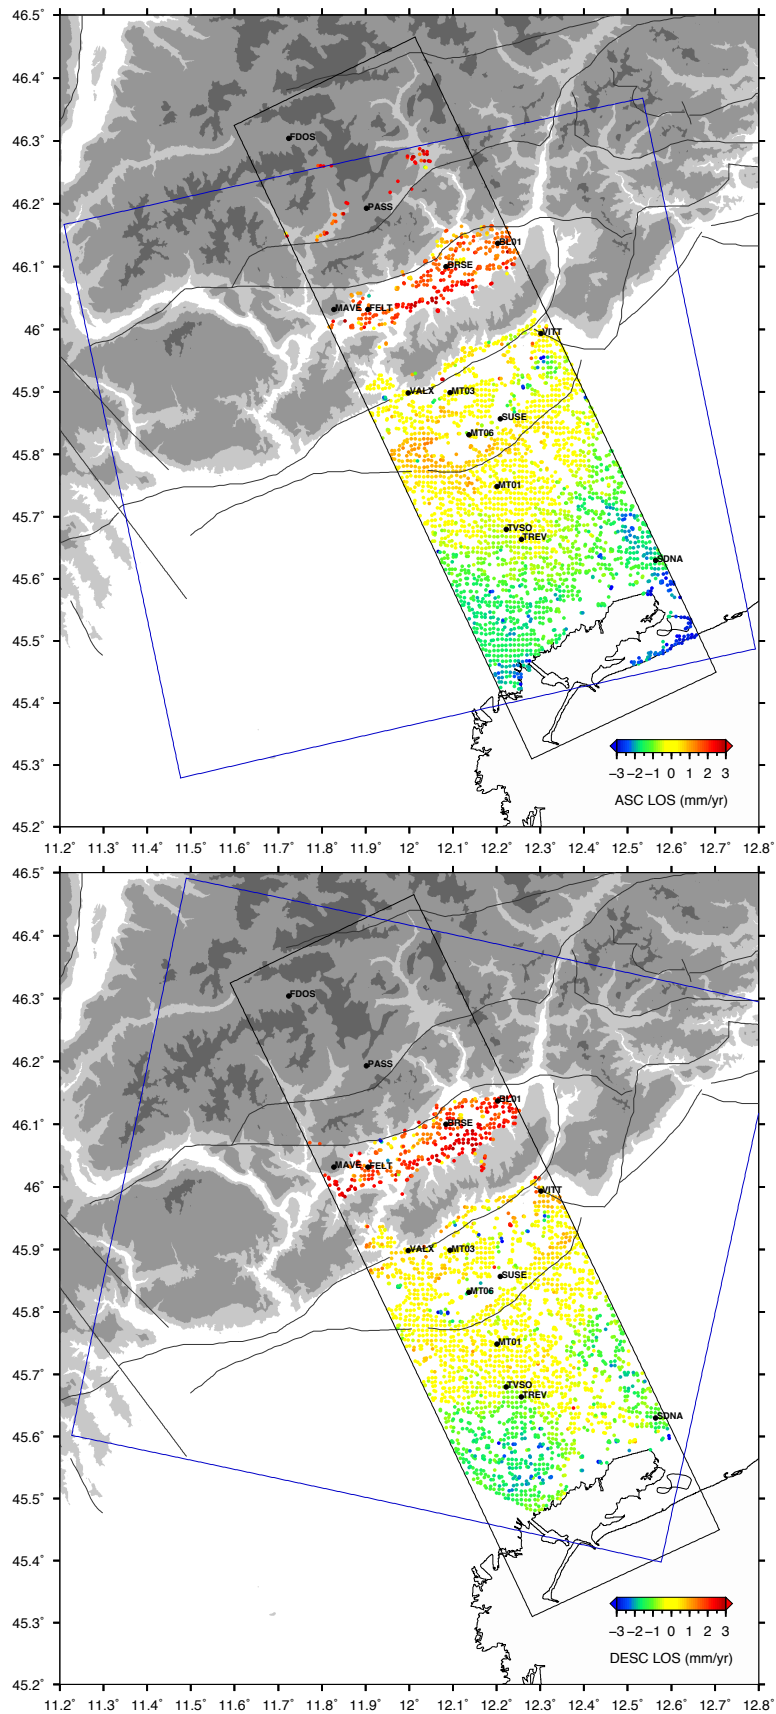

164  
 165 **Figure S4.** Subsampled DInSAR velocities for both the ascending (top) and descending (bottom)  
 166 datasets along a 35 km wide transect oriented towards NNW. The reported GPS sites are those used  
 167 for the dislocation modeling.

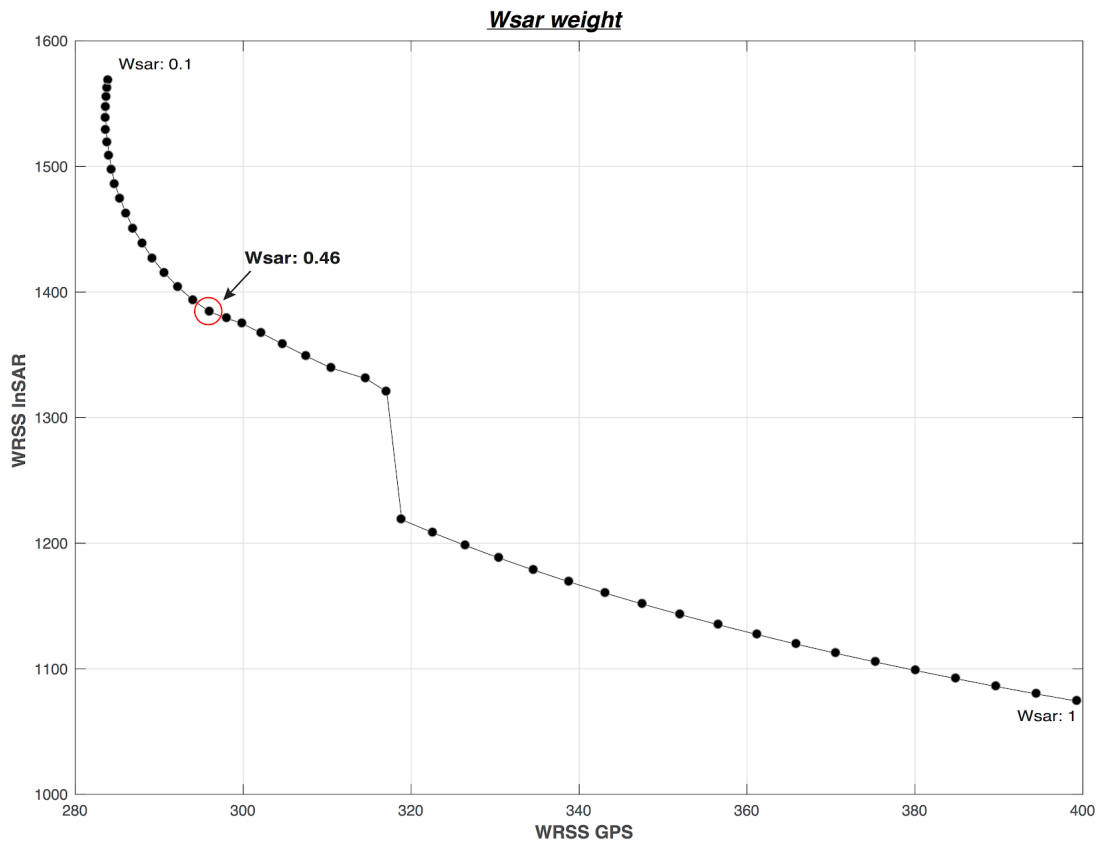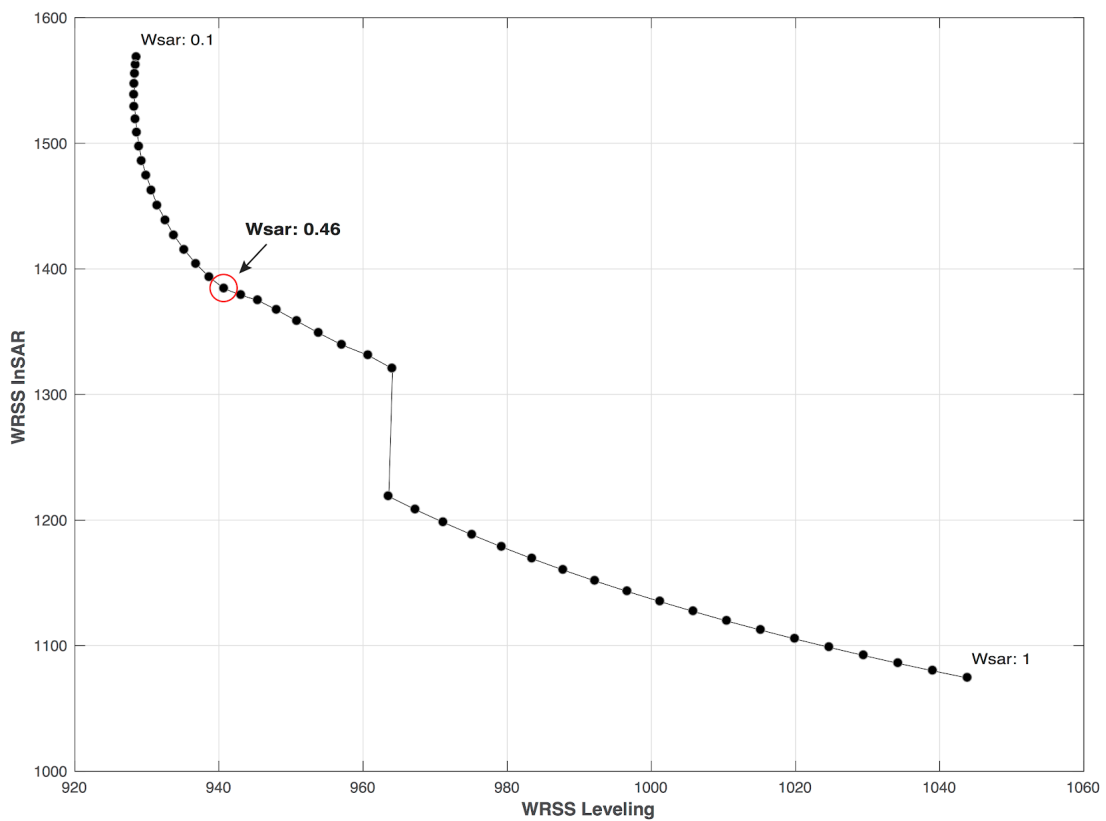

168

169 **Figure S5** Trade-off curves between Weighted Residuals Sum of Squares (WRSS) of GPS and  
 170 InSAR data (top) and Leveling and InSAR data (bottom) varying the weighting factor  $W_{sar}$  in the  
 171 interval  $[0.1-1]$  with steps of 0.02. The optimal value of  $W_{sar}$  0.46 has been chosen as the “knee  
 172 point” of the curves.

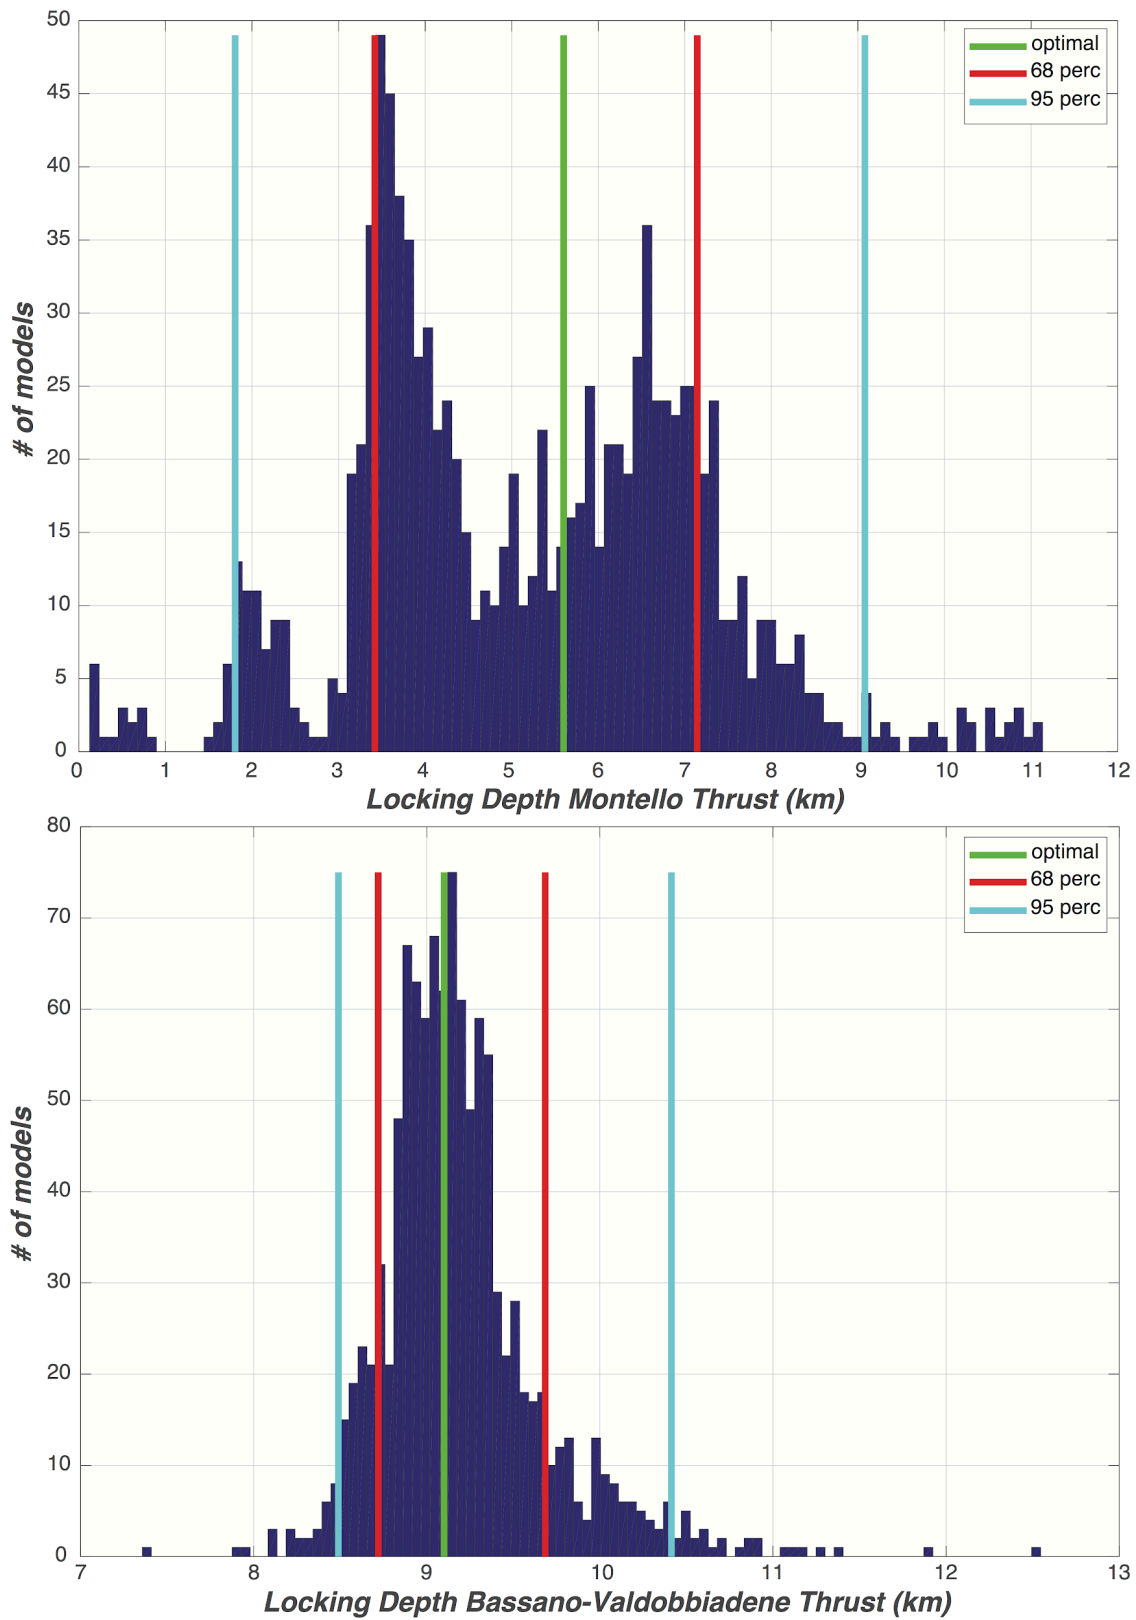

173

174 **Figure S6** Frequency histograms of modeled fault locking depths for the Montello ramp (top) and  
 175 the Bassano-Valdobbiadene thrust (bottom) obtained from 1000 bootstrap resamples (e.g. Árnadóttir  
 176 and Segall 1994) of the InSAR and GPS data. Green lines mark the estimated values of each  
 177 parameter. Light blue and red lines mark lower and upper bounds values at 95 and 68 percentile  
 178 confidence level, respectively.

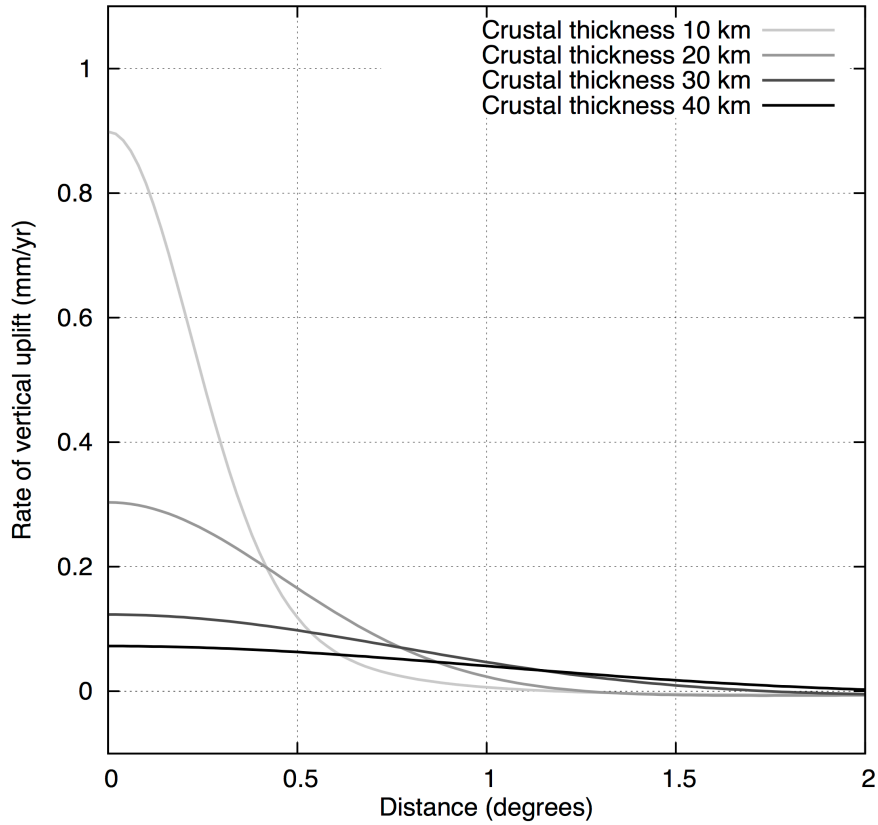

179

180 **Figure S7:** Vertical velocities due to the Piave ice pond melting instantly 10 Kyr ago, modeled as a  
 181 disk, with a cap profile, of an equivalent area of  $\sim 45 \times 15 \text{ km}^2$ , 800 m thick. We used an Earth model  
 182 composed by a crustal layer, a viscosity profile consistent with the ICE5G model (VM2 of Peltier,  
 183 2004), with viscosity values of 2.7, 0.5 and  $0.5 \cdot 10^{21}$  Pa.s in the lower mantle, transition zone and  
 184 upper mantle, respectively. The model is run at harmonic degrees up to 6000.

185

186

187 **Table S1:** Horizontal and vertical GPS velocities in a Adria-fixed reference frame.

188

|     | lon     | lat     | Ve     | Vn     | Se    | Sn    | Ren     | Vu     | Su    | Reu     | Run     | site     | t1        | t2        |
|-----|---------|---------|--------|--------|-------|-------|---------|--------|-------|---------|---------|----------|-----------|-----------|
| 189 | 12.7990 | 46.4147 | 0.574  | -1.243 | 0.032 | 0.051 | -0.0063 | 0.820  | 0.176 | 0.0717  | -0.1707 | AMPE_GPS | 1999.4013 | 2017.3821 |
| 190 | 11.5254 | 45.8663 | 0.077  | -0.547 | 0.053 | 0.053 | 0.0353  | -0.107 | 0.243 | -0.0303 | -0.1583 | ASIA_GPS | 2003.6013 | 2017.3821 |
| 191 | 12.5636 | 46.1931 | -0.026 | -0.636 | 0.096 | 0.093 | -0.0570 | -0.086 | 0.389 | 0.0739  | -0.1616 | BARC_GPS | 2007.8369 | 2017.3821 |
| 192 | 11.7314 | 45.7618 | 0.520  | -0.679 | 0.084 | 0.083 | 0.0011  | 0.182  | 0.197 | 0.0203  | -0.1656 | BASS_GPS | 2007.7712 | 2014.7219 |
| 193 | 13.0694 | 45.6719 | 0.055  | 0.258  | 0.063 | 0.063 | 0.0077  | -2.177 | 0.282 | 0.0005  | -0.1178 | BEVA_GPS | 2008.0368 | 2017.3821 |
| 194 | 12.2025 | 46.1370 | 0.368  | -0.822 | 0.070 | 0.082 | -0.0109 | 1.520  | 0.176 | 0.0340  | -0.1193 | BL01_GPS | 2008.1816 | 2017.3821 |
| 195 | 11.3652 | 46.4970 | 0.928  | -0.546 | 0.138 | 0.121 | 0.0437  | 0.056  | 0.460 | -0.0479 | -0.0718 | BOLZ_GPS | 2012.0532 | 2017.3821 |
| 196 | 11.2842 | 45.4007 | 0.091  | -0.422 | 0.113 | 0.169 | 0.0132  | -0.753 | 0.406 | 0.0391  | -0.1352 | BONI_GPS | 2012.0915 | 2016.9275 |
| 197 | 11.9694 | 45.5329 | 0.073  | -0.213 | 0.103 | 0.092 | 0.0016  | 0.427  | 0.730 | 0.0178  | -0.1010 | BOR2_GPS | 2008.4713 | 2014.9191 |
| 198 | 12.2181 | 46.4372 | 0.578  | -0.924 | 0.115 | 0.102 | 0.1121  | 0.933  | 0.312 | -0.1024 | -0.2098 | BORC_GPS | 2009.2260 | 2017.3821 |
| 199 | 11.0343 | 45.5998 | 0.110  | -0.154 | 0.071 | 0.071 | -0.0009 | -0.080 | 0.220 | 0.0468  | -0.1263 | BOSC_GPS | 2006.1739 | 2016.9467 |
| 200 | 12.0841 | 46.1000 | 0.286  | -1.058 | 0.115 | 0.135 | -0.0295 | 1.943  | 0.328 | 0.0634  | -0.1434 | BRSE_GPS | 2008.7855 | 2017.3821 |
| 201 | 11.2783 | 45.2578 | -0.169 | -0.616 | 0.070 | 0.083 | -0.0050 | -1.811 | 0.334 | 0.0207  | -0.1014 | BTAC_GPS | 2008.6243 | 2017.3821 |
| 202 | 11.3368 | 46.4990 | 0.574  | -0.804 | 0.043 | 0.048 | -0.0544 | 0.987  | 0.132 | 0.0283  | -0.0740 | BZRG_GPS | 1998.0013 | 2017.3821 |
| 203 | 11.9392 | 45.6703 | 0.140  | -0.190 | 0.131 | 0.089 | 0.0092  | -0.771 | 0.280 | 0.0255  | -0.1286 | CAFV_GPS | 2011.1657 | 2017.3821 |
| 204 | 12.4350 | 46.0083 | 0.363  | -0.793 | 0.115 | 0.125 | -0.0716 | -0.051 | 0.161 | 0.1306  | -0.1663 | CANV_GPS | 2004.3838 | 2017.3821 |
| 205 | 12.5827 | 45.4794 | -0.061 | 0.498  | 0.049 | 0.059 | -0.0351 | -2.805 | 0.208 | 0.0413  | -0.1173 | CAVA_GPS | 2001.5438 | 2011.1657 |
| 206 | 12.2655 | 45.2065 | -0.200 | -0.262 | 0.202 | 0.093 | 0.0136  | -3.373 | 0.399 | 0.0212  | -0.1334 | CGIA_GPS | 2010.9630 | 2017.3821 |

|     |         |         |        |        |       |       |         |        |       |         |         |          |           |           |
|-----|---------|---------|--------|--------|-------|-------|---------|--------|-------|---------|---------|----------|-----------|-----------|
| 207 | 11.2814 | 45.5427 | 0.219  | 0.029  | 0.140 | 0.190 | 0.0608  | 0.028  | 0.409 | 0.0481  | -0.1118 | CHI9_GPS | 2012.0833 | 2017.3767 |
| 208 | 11.7946 | 45.6395 | 0.199  | 0.090  | 0.091 | 0.073 | -0.0042 | -2.571 | 0.358 | 0.0301  | -0.1289 | CITD_GPS | 2009.1520 | 2017.3821 |
| 209 | 12.9791 | 45.9585 | 0.026  | 0.061  | 0.054 | 0.064 | -0.0146 | -0.624 | 0.188 | 0.0301  | -0.1330 | CODR_GPS | 2007.3767 | 2017.3821 |
| 210 | 11.7238 | 46.3039 | 0.430  | -0.779 | 0.049 | 0.085 | -0.0243 | 0.893  | 0.179 | 0.0217  | -0.0821 | FDOS_GPS | 2006.1657 | 2017.3821 |
| 211 | 11.9055 | 46.0318 | 0.832  | -1.460 | 0.207 | 0.206 | -0.0032 | 1.307  | 0.393 | 0.0322  | -0.1125 | FELT_GPS | 2012.0751 | 2017.3821 |
| 212 | 13.0011 | 46.4142 | 0.557  | -1.109 | 0.058 | 0.083 | -0.0579 | 0.576  | 0.230 | 0.1522  | -0.1776 | FUSE_GPS | 2007.6917 | 2017.3821 |
| 213 | 12.3850 | 45.9284 | 0.152  | -0.041 | 0.097 | 0.208 | 0.0116  | -1.213 | 0.417 | 0.0206  | -0.1366 | GOD9_GPS | 2012.0860 | 2017.3821 |
| 214 | 13.4161 | 46.1840 | 0.168  | -0.549 | 0.057 | 0.053 | -0.0157 | -0.079 | 0.168 | 0.0207  | -0.1297 | JOAN_GPS | 2007.4890 | 2017.3821 |
| 215 | 11.2685 | 45.1841 | 0.162  | 0.208  | 0.078 | 0.084 | -0.0282 | -1.705 | 0.201 | 0.0258  | -0.1286 | LEGN_GPS | 2008.6516 | 2016.1898 |
| 216 | 11.6691 | 45.7483 | 0.314  | -0.377 | 0.123 | 0.101 | 0.0135  | -0.749 | 0.353 | 0.0115  | -0.1527 | MARO_GPS | 2012.0833 | 2017.3821 |
| 217 | 11.8271 | 46.0321 | 0.236  | -0.065 | 0.097 | 0.086 | -0.0116 | -0.161 | 0.236 | 0.0371  | -0.1188 | MAVE_GPS | 2006.3794 | 2016.9986 |
| 218 | 13.4356 | 45.9245 | -0.043 | 0.199  | 0.035 | 0.028 | -0.0705 | -0.283 | 0.138 | 0.1068  | -0.1859 | MDEA_GPS | 2003.0643 | 2017.3821 |
| 219 | 12.0151 | 45.9753 | 0.303  | -0.332 | 0.110 | 0.165 | -0.0273 | -0.259 | 0.337 | 0.0157  | -0.1182 | MGRD_GPS | 2009.6917 | 2017.3821 |
| 220 | 12.0954 | 45.4976 | 0.078  | 0.169  | 0.133 | 0.119 | 0.0117  | -0.444 | 0.352 | 0.0217  | -0.1284 | MIRA_GPS | 2012.4658 | 2017.3821 |
| 221 | 11.1434 | 46.0981 | 0.618  | -0.371 | 0.050 | 0.051 | -0.0195 | 0.949  | 0.174 | 0.0391  | -0.1246 | MOCA_GPS | 2006.6972 | 2017.3821 |
| 222 | 13.1983 | 46.4067 | 0.340  | -1.018 | 0.035 | 0.070 | 0.0343  | 0.783  | 0.148 | -0.0603 | -0.1809 | MOGG_GPS | 1999.4013 | 2017.3767 |
| 223 | 12.9877 | 46.2408 | 0.054  | -0.679 | 0.061 | 0.089 | -0.0438 | -0.038 | 0.134 | 0.0967  | -0.2029 | MPRA_GPS | 2003.0205 | 2017.3821 |
| 224 | 12.2386 | 45.4904 | -0.244 | 0.165  | 0.064 | 0.107 | 0.0063  | -2.493 | 0.338 | 0.0617  | -0.1274 | MSTR_GPS | 2007.8890 | 2014.6342 |
| 225 | 12.2006 | 45.7487 | -0.033 | 0.300  | 0.056 | 0.077 | -0.0138 | 0.205  | 0.242 | 0.0175  | -0.1300 | MT01_GPS | 2009.2178 | 2017.3821 |
| 226 | 12.1699 | 45.8403 | 0.071  | -0.989 | 0.149 | 0.202 | 0.0878  | -1.694 | 0.822 | -0.2207 | -0.2608 | MT02_GPS | 2009.2150 | 2014.5657 |
| 227 | 12.0934 | 45.8988 | 0.055  | -0.458 | 0.156 | 0.200 | -0.0038 | 1.004  | 0.529 | 0.0431  | -0.1781 | MT03_GPS | 2009.4260 | 2015.4972 |
| 228 | 12.1364 | 45.8313 | 0.587  | -0.974 | 0.121 | 0.186 | 0.0262  | 0.433  | 0.877 | 0.0069  | -0.1539 | MT06_GPS | 2012.0532 | 2017.3821 |
| 229 | 12.5884 | 45.6684 | 0.968  | -0.432 | 0.120 | 0.140 | -0.0043 | -3.217 | 0.287 | 0.0253  | -0.1335 | NOVE_GPS | 2009.4013 | 2017.3821 |
| 230 | 12.4891 | 45.7878 | 0.020  | 0.169  | 0.072 | 0.124 | 0.0112  | -1.259 | 0.298 | 0.0203  | -0.1362 | ODEZ_GPS | 2011.1712 | 2017.3821 |
| 231 | 11.8961 | 45.4112 | 0.128  | -0.391 | 0.042 | 0.064 | -0.0258 | -0.319 | 0.103 | 0.0259  | -0.0949 | PADO_GPS | 2001.9054 | 2017.3821 |
| 232 | 11.1230 | 45.7769 | 0.409  | -0.277 | 0.102 | 0.095 | 0.1243  | 0.061  | 0.270 | -0.0415 | -0.1671 | PARR_GPS | 2006.7794 | 2017.3821 |
| 233 | 11.9020 | 46.1930 | 0.133  | -0.931 | 0.110 | 0.112 | -0.1025 | 0.735  | 0.247 | 0.0529  | -0.0553 | PASS_GPS | 2006.9767 | 2017.3821 |
| 234 | 13.0526 | 45.8057 | -0.031 | -0.276 | 0.043 | 0.045 | -0.0227 | 0.169  | 0.181 | 0.0281  | -0.0951 | PAZO_GPS | 2007.9301 | 2017.3821 |
| 235 | 11.8793 | 45.4222 | -0.173 | -0.198 | 0.235 | 0.198 | -0.0141 | -0.165 | 0.904 | 0.0519  | -0.1150 | PD01_GPS | 2007.8506 | 2010.4890 |
| 236 | 13.3076 | 45.9046 | -0.285 | -0.200 | 0.043 | 0.044 | -0.0039 | 0.096  | 0.120 | 0.0070  | -0.1044 | PLMN_GPS | 1999.4972 | 2012.8811 |
| 237 | 12.6612 | 45.9568 | -0.023 | 0.041  | 0.042 | 0.053 | -0.0120 | -0.021 | 0.140 | 0.0230  | -0.0829 | PORD_GPS | 2002.0013 | 2017.3821 |
| 238 | 12.8331 | 45.7674 | 0.531  | 0.284  | 0.057 | 0.063 | -0.0191 | -2.726 | 0.245 | 0.0316  | -0.1250 | PORT_GPS | 2007.5273 | 2017.3821 |
| 239 | 11.6817 | 46.4226 | 0.648  | -0.891 | 0.086 | 0.082 | -0.1284 | 0.862  | 0.231 | 0.0795  | -0.1791 | POZZ_GPS | 2006.7794 | 2017.3821 |
| 240 | 12.0299 | 45.1959 | 0.255  | -0.123 | 0.079 | 0.082 | 0.0213  | -0.902 | 0.232 | 0.0007  | -0.1540 | REBO_GPS | 2010.3794 | 2017.2917 |
| 241 | 11.0421 | 45.8935 | 0.164  | -0.357 | 0.055 | 0.054 | -0.0421 | 0.262  | 0.229 | 0.0640  | -0.1741 | ROVE_GPS | 2004.1898 | 2017.3821 |
| 242 | 11.0721 | 45.6469 | 0.226  | -0.350 | 0.101 | 0.079 | -0.0393 | 0.107  | 0.251 | 0.0039  | -0.1220 | ROVR_GPS | 2008.7718 | 2017.3821 |
| 243 | 12.3365 | 45.4307 | 0.418  | 0.069  | 0.195 | 0.149 | 0.0065  | -0.950 | 0.516 | 0.0202  | -0.1396 | SAL_GPS  | 2014.3931 | 2017.3821 |
| 244 | 11.1416 | 46.4187 | 0.811  | -0.501 | 0.055 | 0.051 | -0.0184 | 1.306  | 0.192 | 0.0310  | -0.1229 | SARN_GPS | 2006.8287 | 2017.3821 |
| 245 | 11.3630 | 45.7181 | 0.089  | 0.049  | 0.070 | 0.088 | -0.0239 | 0.126  | 0.284 | 0.0382  | -0.1394 | SCHI_GPS | 2008.3920 | 2017.3821 |
| 246 | 12.5642 | 45.6298 | 0.127  | -0.189 | 0.061 | 0.101 | -0.0138 | -0.247 | 0.285 | 0.0257  | -0.0855 | SDNA_GPS | 2007.4863 | 2017.3794 |
| 247 | 11.8020 | 45.6006 | 0.253  | 0.063  | 0.106 | 0.145 | 0.0100  | -1.177 | 0.396 | 0.0240  | -0.1371 | SGIO_GPS | 2012.0833 | 2017.3821 |
| 248 | 11.5094 | 46.0694 | 0.177  | -0.750 | 0.060 | 0.088 | -0.0195 | 0.863  | 0.203 | 0.0213  | -0.1687 | SPER_GPS | 2006.7794 | 2017.3821 |
| 249 | 12.2085 | 45.8570 | 0.216  | -0.299 | 0.122 | 0.108 | 0.0333  | -0.686 | 0.520 | 0.0686  | -0.1755 | SUSE_GPS | 2011.1383 | 2017.3821 |
| 250 | 12.3961 | 46.0605 | 0.458  | -0.216 | 0.165 | 0.218 | 0.0099  | -0.161 | 0.707 | 0.0459  | -0.1486 | TAMB_GPS | 2011.6808 | 2017.3821 |
| 251 | 11.6773 | 45.3428 | -0.240 | 0.056  | 0.045 | 0.044 | -0.0412 | -0.250 | 0.208 | 0.0409  | -0.1112 | TEOL_GPS | 2004.2472 | 2017.3821 |
| 252 | 11.1102 | 46.1023 | 0.287  | 0.290  | 0.128 | 0.113 | 0.0324  | 0.729  | 0.418 | 0.0426  | -0.1754 | TRE8_GPS | 2012.0532 | 2017.3821 |
| 253 | 12.2217 | 45.6798 | 0.111  | 0.070  | 0.121 | 0.120 | 0.0129  | -1.254 | 0.372 | 0.0150  | -0.1398 | TRE9_GPS | 2012.0833 | 2017.3821 |
| 254 | 11.1183 | 46.0909 | 0.761  | -0.619 | 0.082 | 0.079 | 0.0387  | -0.187 | 0.215 | -0.0518 | -0.2216 | TREN_GPS | 2006.7794 | 2017.3821 |
| 255 | 12.2565 | 45.6639 | -0.182 | -0.135 | 0.075 | 0.069 | -0.0182 | 0.176  | 0.251 | 0.0507  | -0.1054 | TREV_GPS | 2004.3319 | 2011.1657 |
| 256 | 12.2432 | 45.6532 | -0.053 | 0.322  | 0.100 | 0.102 | 0.0176  | -0.823 | 0.367 | 0.0091  | -0.1282 | TREX_GPS | 2011.1712 | 2017.3821 |
| 257 | 12.2217 | 45.6798 | 0.020  | -0.016 | 0.072 | 0.080 | -0.0426 | -0.968 | 0.230 | 0.0512  | -0.1344 | TVSO_GPS | 2008.6489 | 2017.3821 |
| 258 | 13.2530 | 46.0375 | -0.064 | -0.174 | 0.047 | 0.052 | -0.0229 | -0.161 | 0.183 | 0.0369  | -0.1337 | UDI1_GPS | 2006.2561 | 2017.3821 |
| 259 | 13.2277 | 46.0552 | 0.192  | 0.027  | 0.083 | 0.098 | 0.0002  | -0.201 | 0.278 | 0.0293  | -0.1220 | UDI2_GPS | 2008.3265 | 2017.3821 |
| 260 | 13.2530 | 46.0372 | -0.135 | 0.816  | 0.170 | 0.280 | 0.0020  | 0.211  | 0.564 | 0.0292  | -0.0677 | UDIN_GPS | 2003.0205 | 2006.6780 |
| 261 | 13.2165 | 46.0831 | -0.129 | -0.217 | 0.073 | 0.080 | 0.0259  | 0.313  | 0.415 | -0.0630 | -0.1904 | UNUD_GPS | 2006.1821 | 2017.3821 |
| 262 | 11.8779 | 45.4067 | 0.222  | 0.156  | 0.151 | 0.185 | -0.0871 | 0.712  | 0.419 | 0.0213  | -0.0941 | UPAD_GPS | 1995.0945 | 2001.8890 |
| 263 | 11.9976 | 45.8982 | 0.068  | -0.720 | 0.143 | 0.193 | 0.0560  | 0.028  | 0.456 | -0.0232 | -0.2067 | VALX_GPS | 2011.1712 | 2017.3821 |
| 264 | 12.5653 | 46.4571 | 0.757  | -0.922 | 0.295 | 0.164 | -0.0150 | 0.144  | 1.470 | 0.0210  | -0.1326 | VARM_GPS | 2014.0068 | 2017.3821 |
| 265 | 12.3578 | 45.4379 | -0.129 | 0.244  | 0.138 | 0.147 | -0.0042 | -2.273 | 0.686 | -0.0783 | -0.2545 | VEAR_GPS | 2006.1602 | 2010.7164 |
| 266 | 11.3667 | 45.7887 | 0.222  | -0.549 | 0.097 | 0.090 | 0.0772  | 0.008  | 0.356 | 0.0946  | -0.0457 | VELO_GPS | 2009.3493 | 2017.3821 |
| 267 | 12.3541 | 45.4306 | 0.110  | -0.566 | 0.067 | 0.100 | -0.0318 | -1.550 | 0.213 | 0.0170  | -0.1255 | VEN1_GPS | 2009.8068 | 2017.3821 |

268 11.0024 45.4447 0.146 -0.480 0.060 0.088 -0.0156 -0.242 0.190 0.0324 -0.0916 VERO\_GPS 2006.8013 2017.3821  
 269 11.5563 45.5641 0.116 -0.254 0.047 0.063 -0.0361 -0.620 0.264 0.0472 -0.1291 VICE\_GPS 2008.6489 2017.3821  
 270 12.3014 45.9933 0.506 -0.721 0.116 0.141 0.0186 0.378 0.347 0.0204 -0.1857 VITT\_GPS 2011.1849 2017.3821  
 271 11.9109 45.3846 -0.163 0.249 0.051 0.050 -0.0285 0.032 0.394 0.0351 -0.1265 VOLT\_GPS 2001.5575 2011.1657  
 272  
 273

274

275 **Table S2:** Vertical ground motion rates (i.e Elevation Change, EC, rates) estimated from the IGM  
 276 elevation measurements performed in the 1952-3 and in the 1984-5 leveling campaigns, where *nbc*  
 277 *m* is the benchmark number, *dist* indicates the distance from the first benchmark and the errors have  
 278 been calculated following the formulas presented in Text S2.

| <b>nbc</b> | <b>m</b> | <b>dist</b><br>(km) | <b>long</b> | <b>lat</b> | <b>1952-3</b><br>(m) | <b>1984-5</b><br>(m) | <b>EC</b><br>(mm) | <b>EC error</b><br>(mm) | <b>EC_rate</b><br>(mm/yr) | <b>EC_rate_sig</b><br>(mm/yr) |
|------------|----------|---------------------|-------------|------------|----------------------|----------------------|-------------------|-------------------------|---------------------------|-------------------------------|
| 0          | 0        | 0                   | 12.2233     | 45.4764    | 3.9672               | 3.8947               | -72.50            | 0.0000                  | -2.2656                   | 0.0000                        |
| 1          | 1        | 1.28                | 12.2222     | 45.4858    | 5.0708               | 4.9954               | -75.40            | 4.0000                  | -2.3563                   | 0.1250                        |
| 2          | 2        | 3.78                | 12.238      | 45.5006    | 2.8441               | 2.7713               | -72.80            | 6.8739                  | -2.2750                   | 0.2148                        |
| 3          | 3        | 4.21                | 12.2386     | 45.5061    | 4.2709               | 4.2169               | -54.00            | 7.2543                  | -1.6875                   | 0.2267                        |
| 4          | 4        | 4.89                | 12.2388     | 45.5106    | 5.8518               | 5.8042               | -47.60            | 7.8182                  | -1.4875                   | 0.2443                        |
| 5          | 5        | 5.22                | 12.2391     | 45.5139    | 4.1567               | 4.1127               | -44.00            | 8.0777                  | -1.3750                   | 0.2524                        |
| 6          | 6        | 5.79                | 12.2386     | 45.5178    | 6.9893               | 6.9506               | -38.70            | 8.5073                  | -1.2094                   | 0.2659                        |
| 7          | 7        | 8.85                | 12.2366     | 45.5442    | 6.8699               | 6.8383               | -31.60            | 10.5178                 | -0.9875                   | 0.3287                        |
| 8          | 8        | 9.02                | 12.2358     | 45.5494    | 6.0162               | 5.9771               | -39.10            | 10.6184                 | -1.2219                   | 0.3318                        |
| 9          | 9        | 9.39                | 12.2352     | 45.5528    | 8.4444               | 8.4                  | -44.40            | 10.8340                 | -1.3875                   | 0.3386                        |
| 10         | 10       | 11.68               | 12.2358     | 45.5692    | 8.0962               | 8.0654               | -30.80            | 12.0830                 | -0.9625                   | 0.3776                        |
| 11         | 11       | 12.48               | 12.2341     | 45.5778    | 8.4539               | 8.44                 | -13.90            | 12.4900                 | -0.4344                   | 0.3903                        |
| 12         | 12       | 12.62               | 12.2338     | 45.5778    | 9.265                | 9.2273               | -37.70            | 12.5599                 | -1.1781                   | 0.3925                        |
| 13         | 13       | 14.68               | 12.2358     | 45.5958    | 13.4197              | 13.4128              | -6.90             | 13.5462                 | -0.2156                   | 0.4233                        |
| 14         | 14       | 15.64               | 12.2344     | 45.6028    | 14.8071              | 14.7969              | -10.20            | 13.9821                 | -0.3188                   | 0.4369                        |
| 15         | 15       | 15.65               | 12.2344     | 45.6028    | 14.9285              | 14.9212              | -7.30             | 13.9866                 | -0.2281                   | 0.4371                        |
| 16         | 16       | 16.91               | 12.2372     | 45.6083    | 10.813               | 10.8077              | -5.30             | 14.5387                 | -0.1656                   | 0.4543                        |
| 17         | 17       | 17.58               | 12.2391     | 45.6186    | 11.2075              | 11.203               | -4.50             | 14.8240                 | -0.1406                   | 0.4632                        |
| 18         | 18       | 19.49               | 12.2411     | 45.6358    | 14.9831              | 14.976               | -7.10             | 15.6085                 | -0.2219                   | 0.4878                        |
| 19         | 19       | 20.79               | 12.2444     | 45.6481    | 14.6418              | 14.6402              | -1.60             | 16.1206                 | -0.0500                   | 0.5038                        |
| 20         | 20       | 22.53               | 12.2463     | 45.6656    | 17.0483              | 17.0462              | -2.10             | 16.7817                 | -0.0656                   | 0.5244                        |
| 21         | 21       | 23.35               | 12.2561     | 45.6653    | 11.0334              | 11.0012              | -32.20            | 17.0843                 | -1.0063                   | 0.5339                        |
| 22         | 22       | 24.07               | 12.2499     | 45.6708    | 16.0511              | 16.051               | -0.10             | 17.3457                 | -0.0031                   | 0.5421                        |
| 23         | 23       | 25                  | 12.2516     | 45.6789    | 14.4759              | 14.4685              | -7.40             | 17.6777                 | -0.2313                   | 0.5524                        |
| 24         | 24       | 25.97               | 12.258      | 45.6883    | 18.4302              | 18.4312              | 1.00              | 18.0174                 | 0.0313                    | 0.5630                        |
| 25         | 25       | 27.04               | 12.2597     | 45.695     | 19.8531              | 19.8537              | 0.60              | 18.3848                 | 0.0188                    | 0.5745                        |
| 26         | 26       | 27.35               | 12.2599     | 45.6992    | 22.2282              | 22.2354              | 7.20              | 18.4899                 | 0.2250                    | 0.5778                        |

|    |       |         |         |          |          |        |         |         |        |
|----|-------|---------|---------|----------|----------|--------|---------|---------|--------|
| 27 | 27.98 | 12.2599 | 45.7036 | 22.8142  | 22.804   | -10.20 | 18.7016 | -0.3188 | 0.5844 |
| 28 | 30.04 | 12.2558 | 45.7214 | 28.8918  | 28.8972  | 5.40   | 19.3778 | 0.1688  | 0.6056 |
| 29 | 34.25 | 12.2522 | 45.7578 | 48.202   | 48.2054  | 3.40   | 20.6912 | 0.1063  | 0.6466 |
| 30 | 36.47 | 12.2586 | 45.7767 | 52.8135  | 52.8194  | 5.90   | 21.3512 | 0.1844  | 0.6672 |
| 31 | 36.51 | 12.2597 | 45.7769 | 56.4738  | 56.4807  | 6.90   | 21.3629 | 0.2156  | 0.6676 |
| 32 | 37.13 | 12.2594 | 45.7822 | 55.2555  | 55.2605  | 5.00   | 21.5436 | 0.1563  | 0.6732 |
| 33 | 38.21 | 12.2558 | 45.7914 | 58.1218  | 58.1204  | -1.40  | 21.8546 | -0.0438 | 0.6830 |
| 34 | 39.19 | 12.2536 | 45.8    | 64.4865  | 64.4942  | 7.70   | 22.1331 | 0.2406  | 0.6917 |
| 35 | 40.15 | 12.2505 | 45.8086 | 67.3459  | 67.3567  | 10.80  | 22.4026 | 0.3375  | 0.7001 |
| 36 | 40.98 | 12.2491 | 45.8142 | 72.4976  | 72.4824  | -15.20 | 22.6329 | -0.4750 | 0.7073 |
| 37 | 41.37 | 12.253  | 45.8178 | 72.9978  | 73.0142  | 16.40  | 22.7404 | 0.5125  | 0.7106 |
| 38 | 42.85 | 12.2572 | 45.83   | 67.5596  | 67.5728  | 13.20  | 23.1436 | 0.4125  | 0.7232 |
| 39 | 43.6  | 12.2558 | 45.8369 | 70.8439  | 70.8657  | 21.80  | 23.3452 | 0.6813  | 0.7295 |
| 40 | 44.65 | 12.2513 | 45.8453 | 74.7978  | 74.8106  | 12.80  | 23.6247 | 0.4000  | 0.7383 |
| 41 | 45.62 | 12.2513 | 45.8503 | 77.3346  | 77.3514  | 16.80  | 23.8799 | 0.5250  | 0.7462 |
| 42 | 46.71 | 12.2633 | 45.8589 | 64.9263  | 64.9386  | 12.30  | 24.1635 | 0.3844  | 0.7551 |
| 43 | 48.89 | 12.2805 | 45.8728 | 60.3113  | 60.3215  | 10.20  | 24.7209 | 0.3188  | 0.7725 |
| 44 | 49.76 | 12.2886 | 45.8789 | 58.8121  | 58.8069  | -5.20  | 24.9399 | -0.1625 | 0.7794 |
| 45 | 50.12 | 12.2908 | 45.8803 | 59.3332  | 59.3427  | 9.50   | 25.0300 | 0.2969  | 0.7822 |
| 46 | 50.76 | 12.2999 | 45.8839 | 63.9551  | 63.9417  | -13.40 | 25.1893 | -0.4188 | 0.7872 |
| 47 | 54.09 | 12.3302 | 45.9019 | 66.447   | 66.4603  | 13.30  | 26.0024 | 0.4156  | 0.8126 |
| 48 | 55.08 | 12.3255 | 45.9103 | 70.0553  | 70.0792  | 23.90  | 26.2393 | 0.7469  | 0.8200 |
| 49 | 55.96 | 12.3216 | 45.9175 | 75.2025  | 75.2264  | 23.90  | 26.4481 | 0.7469  | 0.8265 |
| 50 | 56.88 | 12.3224 | 45.9256 | 80.4213  | 80.4458  | 24.50  | 26.6646 | 0.7656  | 0.8333 |
| 51 | 60.31 | 12.3249 | 45.9553 | 103.1457 | 103.1699 | 24.20  | 27.4568 | 0.7563  | 0.8580 |
| 52 | 61.39 | 12.3249 | 45.9633 | 107.0572 | 107.0833 | 26.10  | 27.7015 | 0.8156  | 0.8657 |
| 53 | 61.9  | 12.3202 | 45.9653 | 107.4331 | 107.4595 | 26.40  | 27.8164 | 0.8250  | 0.8693 |
| 54 | 62.4  | 12.3147 | 45.9697 | 114.1532 | 114.1788 | 25.60  | 27.9285 | 0.8000  | 0.8728 |
| 55 | 62.5  | 12.3169 | 45.9675 | 112.8119 | 112.8413 | 29.40  | 27.9508 | 0.9188  | 0.8735 |
| 56 | 63.89 | 12.3083 | 45.9758 | 123.8826 | 123.9171 | 34.50  | 28.2600 | 1.0781  | 0.8831 |
| 57 | 64.31 | 12.3047 | 45.9814 | 127.7338 | 127.7659 | 32.10  | 28.3527 | 1.0031  | 0.8860 |
| 58 | 64.69 | 12.2961 | 45.9856 | 138.3567 | 138.3943 | 37.60  | 28.4363 | 1.1750  | 0.8886 |
| 59 | 65.69 | 12.2936 | 45.9931 | 143.6824 | 143.7197 | 37.30  | 28.6553 | 1.1656  | 0.8955 |
| 60 | 66.71 | 12.2919 | 46.0003 | 141.5122 | 141.5556 | 43.40  | 28.8769 | 1.3563  | 0.9024 |
| 61 | 67.02 | 12.2913 | 46.0031 | 141.5246 | 141.5715 | 46.90  | 28.9439 | 1.4656  | 0.9045 |
| 62 | 67.89 | 12.2888 | 46.0094 | 157.0616 | 157.1057 | 44.10  | 29.1312 | 1.3781  | 0.9103 |
| 63 | 68.85 | 12.2905 | 46.0181 | 164.6513 | 164.6908 | 39.50  | 29.3364 | 1.2344  | 0.9168 |
| 64 | 69.87 | 12.2955 | 46.0256 | 168.5418 | 168.5833 | 41.50  | 29.5529 | 1.2969  | 0.9235 |
| 65 | 71.28 | 12.3033 | 46.0306 | 186.9851 | 187.0435 | 58.40  | 29.8496 | 1.8250  | 0.9328 |

|    |       |         |         |          |          |       |         |         |        |
|----|-------|---------|---------|----------|----------|-------|---------|---------|--------|
| 66 | 72.09 | 12.3111 | 46.0383 | 230.2242 | 230.2609 | 36.70 | 30.0187 | 1.1469  | 0.9381 |
| 67 | 73.08 | 12.3099 | 46.0433 | 286.2116 | 286.2525 | 40.90 | 30.2242 | 1.2781  | 0.9445 |
| 68 | 73.9  | 12.3149 | 46.05   | 285.9962 | 286.0455 | 49.30 | 30.3933 | 1.5406  | 0.9498 |
| 69 | 77.97 | 12.3349 | 46.0756 | 444.0567 | 444.1064 | 49.70 | 31.2190 | 1.5531  | 0.9756 |
| 70 | 78.48 | 12.3361 | 46.0775 | 427.211  | 427.2544 | 43.40 | 31.3209 | 1.3563  | 0.9788 |
| 71 | 78.9  | 12.3374 | 46.0792 | 489.1689 | 489.2214 | 52.50 | 31.4046 | 1.6406  | 0.9814 |
| 72 | 79.79 | 12.3358 | 46.0847 | 454.0982 | 454.0907 | -7.50 | 31.5812 | -0.2344 | 0.9869 |
| 73 | 80.48 | 12.333  | 46.0875 | 433.4771 | 433.5343 | 57.20 | 31.7175 | 1.7875  | 0.9912 |
| 74 | 80.49 | 12.333  | 46.0875 | 431.0088 | 431.0657 | 56.90 | 31.7195 | 1.7781  | 0.9912 |
| 75 | 80.9  | 12.3299 | 46.0919 | 407.2951 | 407.3571 | 62.00 | 31.8002 | 1.9375  | 0.9938 |
| 76 | 82.99 | 12.3274 | 46.1092 | 390.602  | 390.665  | 63.00 | 32.2083 | 1.9688  | 1.0065 |
| 77 | 84.15 | 12.3241 | 46.1178 | 395.9218 | 395.9829 | 61.10 | 32.4326 | 1.9094  | 1.0135 |
| 78 | 84.97 | 12.3197 | 46.1253 | 386.2923 | 386.3601 | 67.80 | 32.5903 | 2.1188  | 1.0184 |
| 79 | 86.1  | 12.318  | 46.135  | 385.2408 | 385.3068 | 66.00 | 32.8062 | 2.0625  | 1.0252 |
| 80 | 87.01 | 12.3199 | 46.1447 | 385.5099 | 385.5775 | 67.60 | 32.9792 | 2.1125  | 1.0306 |
| 81 | 88.11 | 12.3202 | 46.1522 | 387.5125 | 387.5673 | 54.80 | 33.1870 | 1.7125  | 1.0371 |
| 82 | 91.1  | 12.303  | 46.1733 | 391.7877 | 391.8642 | 76.50 | 33.7454 | 2.3906  | 1.0545 |
| 83 | 91.98 | 12.2938 | 46.1728 | 398.1984 | 398.2644 | 66.00 | 33.9080 | 2.0625  | 1.0596 |
| 84 | 93.72 | 12.2833 | 46.1789 | 402.5926 | 402.668  | 75.40 | 34.2272 | 2.3563  | 1.0696 |

279

280

281

282 **Table S3:** Parameters used for the subsampling of the ascending and descending InSAR datasets,  
 283 whose definition is reported in Text S3

| <b>Orbit</b> | <b><math>T_p</math></b> | <b><math>N_p</math></b> | <b><math>R</math></b> | <b><math>div_{lon}</math></b> | <b><math>div_{lat}</math></b> | <b><math>n_{crit}</math></b> | <b><math>final\ pixel</math></b> |
|--------------|-------------------------|-------------------------|-----------------------|-------------------------------|-------------------------------|------------------------------|----------------------------------|
| Asc          | 101273                  | 2500                    | 25%                   | 10                            | 10                            | 1000                         | 2679                             |
| Desc         | 85474                   | 2500                    | 38%                   | 9                             | 9                             | 1050                         | 2343                             |

284

285

## 286 **References**

287 Altamimi, Z., Collilieux, X., Métivier, L., 2011. ITRF2008: an improved solution of the international  
 288 terrestrial reference frame. *J Geodesy* 85, 457–473. doi:10.1007/s00190-011-0444-4.

289 Árnadóttir, T., Segall, P., 1994. The 1989 Loma Prieta earthquake imaged from inversion of geodetic  
 290 data. *Journal of Geophysical Research: Solid Earth* 99, 21835–21855. doi:10.1029/94JB01256.

291 Blewitt, G., Lavallée, D., 2002. Effect of annual signals on geodetic velocity. *J Geophys Res* 107,  
 292 2145. doi:10.1029/2001JB000570.



293 Boehm, J., Werl, B., Schuh, H., 2006. Troposphere mapping functions for GPS and very long baseline  
 294 interferometry from European Centre for Medium-Range Weather Forecasts operational analysis  
 295 data. *J Geophys Res* 111. doi:10.1029/2005JB003629.

296 D'Anastasio, E., DeMartini, P.M., Selvaggi, G., Pantosti, D., Marchioni, A., Maseroli, R., 2006.  
 297 Short-term vertical velocity field in the Apennines (Italy) revealed by geodetic levelling data.  
 298 *Tectonophysics* 418, 219–234, doi:10.1016/j.tecto.2006.02.008

299 Dong, D., Herring, T., King, R., 1998. Estimating regional deformation from a combination of space  
 300 and terrestrial geodetic data. *J Geodesy* 72, 200–214.

301 Dong, D., Fang, P., Bock, Y., Cheng, M., Miyazaki, S., 2002. Anatomy of apparent seasonal  
 302 variations from GPS-derived site position time series. *J Geophys Res-Sol Ea* 107, –.  
 303 doi:10.1029/2001JB000573.

304 Dong, D., Fang, P., Bock, Y., Webb, F., Prawirodirdjo, L., Kedar, S., Jamason, P., 2006.  
 305 Spatiotemporal filtering using principal component analysis and Karhunen-Loeve expansion  
 306 approaches for regional GPS network analysis. *Journal of Geophysical Research: Solid Earth* 111,  
 307 doi:10.1029/2005JB003806

308 Herring, T. A., King, R. W., Floyd, M. A., McClusky, S. C., 2015. Introduction to GAMIT/GLOBK,  
 309 Release 10.6. Retrieved from [http://www-gpsg.mit.edu/~simon/gtgk/Intro\\_GG.pdf](http://www-gpsg.mit.edu/~simon/gtgk/Intro_GG.pdf).

310 Lagler, K., Schindelegger, M., Böhm, J., Krásná, H., & Nilsson, T. (2013). GPT2: Empirical slant  
 311 delay model for radio space geodetic techniques. *Geophysical Research Letters*, 40, 1069–1073.  
 312 <https://doi.org/10.1002/grl.50288>.

313 Lyard, F., Lefevre, F., Letellier, T., & Francis, O. (2006). Modelling the global ocean tides: Modern  
 314 insights from FES2004. *Ocean Dynamics*, 56(5-6), 394–415. [https://doi.org/10.1007/s10236-006-](https://doi.org/10.1007/s10236-006-0086-x)  
 315 [0086-x](https://doi.org/10.1007/s10236-006-0086-x) .

316 Peltier, W.R. 2004. Global glacial isostasy and the surface of the ice-age Earth: the ICE-5G (VM2)  
 317 model and GRACE. *Annual Review of Earth and Planetary Sciences* 2004 32:1, 111-149,  
 318 doi:10.1146/annurev.earth.32.082503.144359.

319 Schmid, R., Rothacher, M., Thaller, D., Steigenberger, P., 2005. Absolute phase center corrections  
 320 of satellite and receiver antennas. *GPS Solut* 9, 283–293. doi:10.1007/s10291-005-0134-x.

321 Schmid, R., Steigenberger, P., Gendt, G., Ge, M., Rothacher, M., 2007. Generation of a consistent  
 322 absolute phase-center correction model for GPS receiver and satellite antennas. *J Geodesy* 81, 781–  
 323 798. doi:10.1007/s00190-007-0148-y.

324 Serpelloni, E., Casula, G., Galvani, A., Anzidei, M., Baldi, P., 2006. Data analysis of permanent GPS  
 325 networks in Italy and surrounding regions: application of a distributed processing approach. *Ann*  
 326 *Geophys-Italy* 49, 897–928.

327 Serpelloni, E., Faccenna, C., Spada, G., Dong, D., Williams, S.D.P., 2013. Vertical GPS ground  
328 motion rates in the Euro-Mediterranean region: New evidence of velocity gradients at different spatial  
329 scales along the Nubia-Eurasia plate boundary. *J Geophys Res-Sol Ea* 118, 6003–6024.  
330 doi:10.1002/2013JB010102.

331 Vignal, J., 1936. Evaluation de la precision d'une methode de nivellement. *Bull. Geod.*, 49, 1–159.

332 Vignal, J., 1950. Comptes rendus des séances de travail de la Secion II. Nivellements, de l'Association  
333 Internationale de Géodésie à l'Assemblée Générale d'Oslo (Aout 1948). *Bull. Géod.* 18, 401–565.

334

335
